# Supplementary material
Source: HighWire-hosted journal article supplement (https://www.jneurosci.org/content/41/13/2944)
Supplement: inline-supplementary-material-2 [file inline-supplementary-material-2.xlsx]

## Sheet: Fig. 4E
Fig. 4-1 - Complementary data
Power	Group	Subject	Time			Descriptive Statistics
6.93919	PV-Cre	#12	1
7.97732	PV-Cre	#12	2					PV-Cre	PV-Cre/NR1f/f
8.0509	PV-Cre	#12	3			Mean		11.0367	6.75875
18.3024	PV-Cre	#14	1			95% Confidence Interval for Mean	Lower Bound	8.3107	6.28626
17.4175	PV-Cre	#14	2				Upper Bound	13.7627	7.23123
17.11	PV-Cre	#14	3			5% Trimmed Mean		10.8803	6.71838
10.329	PV-Cre	#18	1			Median		9.91449	6.69049
11.1646	PV-Cre	#18	2			Variance		18.408	0.378
11.747	PV-Cre	#18	3			Std. Deviation		4.29043	0.61468
9.4985	PV-Cre	#19	1			SEM		2.14521	0.354886
7.31415	PV-Cre	#19	2			Minimum		6.58592	5.9977
6.58592	PV-Cre	#19	3			Maximum		18.3024	8.2464
6.69049	PV-Cre/NR1f/f	#20	1			Range		11.7165	2.24869
6.86699	PV-Cre/NR1f/f	#20	2			Interquartile Range		8.28862	0.35951
6.71461	PV-Cre/NR1f/f	#20	3
5.9977	PV-Cre/NR1f/f	#21	1			Normality Test
6.76883	PV-Cre/NR1f/f	#21	2			Kolmogorov-Smirnov
6.6269	PV-Cre/NR1f/f	#21	3				KS-stat	df	p-value
6.37435	PV-Cre/NR1f/f	#22	1			PV-Cre NR1f/f	0.319	9	0.009
6.54244	PV-Cre/NR1f/f	#22	2			PV-Cre	0.184	12	0.2
8.2464	PV-Cre/NR1f/f	#22	3
						Linear Mixed Models					Generalized estimation equations
						Fixed variables	Group; Time				Fixed variables	Group; Time;
						Random variables	Subject				Random variables	Subject
						Akaike's Information Criterion (AIC)	89.901				Quasi Likelihood under Independence Model Criterion (QIC)	9.604
						Fixed Effects					Model Effects
								F	p-value			Wald Chi-Square	df	p-value
							Group	F(1,7) = 3.384	0.108		Group	12.238	1	0.000468
							Time	F(2,7) = 0.189	0.832		Time	0.04	2	0.979974
						Normality of Residuals
						Kolmogorov-Smirnov
							KS-stat	df	p-value
						Residuals	0.238	21	0.003

## Sheet: Fig. 4F - Left
Power	Group	Subject	Time	Power*E-4		Descriptive Statistics (power*10^4)
9.1486e-05	PV-Cre	#12	1	0.91486
8.72219e-05	PV-Cre	#12	2	0.872219				PV-Cre	PV-Cre/NR1f/f
9.28627e-05	PV-Cre	#12	3	0.928627		Mean		1.249	1.89943
0.000131014	PV-Cre	#14	1	1.31014		95% Confidence Interval for Mean	Lower Bound	1.06176	1.61767
0.000145789	PV-Cre	#14	2	1.45789			Upper Bound	1.43624	2.18119
0.000163729	PV-Cre	#14	3	1.63729		5% Trimmed Mean		1.24837	1.89894
0.000141782	PV-Cre	#18	1	1.41782		Median		1.30908	1.74656
0.000152908	PV-Cre	#18	2	1.52908		Variance		0.087	0.134
0.000162775	PV-Cre	#18	3	1.62775		Std. Deviation		0.294701	0.366559
9.05377e-05	PV-Cre	#19	1	0.905377		SEM		0.14735	0.211633
0.000107902	PV-Cre	#19	2	1.07902		Minimum		0.872	1.40435
0.000130801	PV-Cre	#19	3	1.30801		Maximum		1.63729	2.4034
0.000233731	PV-Cre/NR1f/f	#20	1	2.33731		Range		0.76529	0.99905
0.00024034	PV-Cre/NR1f/f	#20	2	2.4034		Interquartile Range		0.59279	0.69369
0.000228474	PV-Cre/NR1f/f	#20	3	2.28474
0.000163966	PV-Cre/NR1f/f	#21	1	1.63966		Normality Test
0.0001595	PV-Cre/NR1f/f	#21	2	1.595		Kolmogorov-Smirnov
0.000140435	PV-Cre/NR1f/f	#21	3	1.40435			KS-stat	df	p-value
0.00016911	PV-Cre/NR1f/f	#22	1	1.6911		PV-Cre NR1f/f	0.217	9	0.2
0.000174656	PV-Cre/NR1f/f	#22	2	1.74656		PV-Cre	0.195	12	0.2
0.000199275	PV-Cre/NR1f/f	#22	3	1.99275
						Linear Mixed Models
						Fixed variables	Group; Time
						Random variables	Subject
						Akaike's Information Criterion (AIC)	-7.90552
						Fixed Effects
								F	p-value
							Group	F(1,7) = 198.790	0.001703
							Time	F(2,7) = 2.476	0.153775
						Normality of Residuals
						Kolmogorov-Smirnov
							KS-stat	df	p-value
						Residuals	0.169	21	0.122

## Sheet: Fig. 4F - Right
Power	Group	Subject	Time	Power*E-4		Descriptive Statistics (power*10^4)
9.60739e-05	PV-Cre	#12	1	0.960739
9.38687e-05	PV-Cre	#12	2	0.938687				PV-Cre	PV-Cre/NR1f/f
9.8708e-05	PV-Cre	#12	3	0.98708		Mean		1.24059	1.83408
0.000131593	PV-Cre	#14	1	1.31593		95% Confidence Interval for Mean	Lower Bound	1.10303	1.75964
0.000144151	PV-Cre	#14	2	1.44151			Upper Bound	1.37815	1.90851
0.000153608	PV-Cre	#14	3	1.53608		5% Trimmed Mean		1.24093	1.83646
0.000133441	PV-Cre	#18	1	1.33441		Median		1.26827	1.84328
0.000144819	PV-Cre	#18	2	1.44819		Variance		0.047	0.009
0.000148399	PV-Cre	#18	3	1.48399		Std. Deviation		0.216498	0.0968342
0.000107109	PV-Cre	#19	1	1.07109		SEM		0.108249	0.0559073
0.000114828	PV-Cre	#19	2	1.14828		Minimum		0.939	1.63501
0.000122061	PV-Cre	#19	3	1.22061		Maximum		1.53608	1.99021
0.000178448	PV-Cre/NR1f/f	#20	1	1.78448		Range		0.59708	0.3552
0.000184328	PV-Cre/NR1f/f	#20	2	1.84328		Interquartile Range		0.43849	0.08983
0.000181299	PV-Cre/NR1f/f	#20	3	1.81299
0.000185156	PV-Cre/NR1f/f	#21	1	1.85156		Normality Test
0.000181252	PV-Cre/NR1f/f	#21	2	1.81252		Kolmogorov-Smirnov
0.000163501	PV-Cre/NR1f/f	#21	3	1.63501			KS-stat	df	p-value
0.000199021	PV-Cre/NR1f/f	#22	1	1.99021		PV-Cre NR1f/f	0.193	9	0.2
0.000191443	PV-Cre/NR1f/f	#22	2	1.91443		PV-Cre	0.157	12	0.2
0.000186223	PV-Cre/NR1f/f	#22	3	1.86223
						Linear Mixed Models
						Fixed variables	Group; Time
						Random variables	Subject
						Akaike's Information Criterion (AIC)	-24.7177
						Fixed Effects
								F	p-value
							Group	F(1,7) = 67,072	7.8e-05
							Time	F(2,7) = 1,426	0.302431
						Normality of Residuals
						Kolmogorov-Smirnov
							KS-stat	df	p-value
						Residuals	0.181	21	0.071

## Sheet: Fig. 4G - Left
Power	Group	Subject	Time	Power*E-4		Descriptive Statistics (power*10^4)
8.48521e-05	PV-Cre	#12	1	0.848521
8.45471e-05	PV-Cre	#12	2	0.845471				PV-Cre	PV-Cre/NR1f/f
8.83042e-05	PV-Cre	#12	3	0.883042		Mean		1.25711	2.00671
0.000134641	PV-Cre	#14	1	1.34641		95% Confidence Interval for Mean	Lower Bound	1.05627	1.76623
0.000144823	PV-Cre	#14	2	1.44823			Upper Bound	1.45794	2.24719
0.000156082	PV-Cre	#14	3	1.56082		5% Trimmed Mean		1.25281	2.0028
0.00015108	PV-Cre	#18	1	1.5108		Median		1.24768	1.89852
0.000158501	PV-Cre	#18	2	1.58501		Variance		0.1	0.098
0.000174653	PV-Cre	#18	3	1.74653		Std. Deviation		0.316093	0.312852
0.000106254	PV-Cre	#19	1	1.06254		SEM		0.158046	0.180625
0.000109898	PV-Cre	#19	2	1.09898		Minimum		0.845	1.62002
0.000114895	PV-Cre	#19	3	1.14895		Maximum		1.74653	2.46383
0.000238409	PV-Cre/NR1f/f	#20	1	2.38409		Range		0.90153	0.84381
0.000246383	PV-Cre/NR1f/f	#20	2	2.46383		Interquartile Range		0.62043	0.59998
0.000235115	PV-Cre/NR1f/f	#20	3	2.35115
0.000189852	PV-Cre/NR1f/f	#21	1	1.89852		Normality Test
0.000192448	PV-Cre/NR1f/f	#21	2	1.92448		Kolmogorov-Smirnov
0.000188299	PV-Cre/NR1f/f	#21	3	1.88299			KS-stat	df	p-value
0.000167994	PV-Cre/NR1f/f	#22	1	1.67994		PV-Cre NR1f/f	0.27	9	0.057
0.000162002	PV-Cre/NR1f/f	#22	2	1.62002		PV-Cre	0.144	12	0.2
0.000185535	PV-Cre/NR1f/f	#22	3	1.85535
						Linear Mixed Models
						Fixed variables	Group; Time
						Random variables	Subject
						Akaike's Information Criterion (AIC)	-26.4555
						Fixed Effects
								F	p-value
							Group	F(1,7) = 197.338	2e-06
							Time	F(2,7) = 4.667	0.051515
						Normality of Residuals
						Kolmogorov-Smirnov
							KS-stat	df	p-value
						Residuals	0.173	21	0.099

## Sheet: Fig. 4G - Right
Power	Group	Subject	Time	Power*E-4		Descriptive Statistics (power*10^4)
8.87883e-05	PV-Cre	#12	1	0.887883
9.16345e-05	PV-Cre	#12	2	0.916345				PV-Cre	PV-Cre/NR1f/f
9.63386e-05	PV-Cre	#12	3	0.963386		Mean		1.2411	1.94182
0.000141765	PV-Cre	#14	1	1.41765		95% Confidence Interval for Mean	Lower Bound	1.06146	1.83892
0.000151353	PV-Cre	#14	2	1.51353			Upper Bound	1.42073	2.04472
0.000159893	PV-Cre	#14	3	1.59893		5% Trimmed Mean		1.24083	1.94584
0.000139063	PV-Cre	#18	1	1.39063		Median		1.2203	1.98223
0.000151471	PV-Cre	#18	2	1.51471		Variance		0.08	0.018
0.000158065	PV-Cre	#18	3	1.58065		Std. Deviation		0.282729	0.133867
0.000104997	PV-Cre	#19	1	1.04997		SEM		0.141364	0.0772881
0.000103181	PV-Cre	#19	2	1.03181		Minimum		0.888	1.7258
0.000102827	PV-Cre	#19	3	1.02827		Maximum		1.59893	2.08551
0.000188316	PV-Cre/NR1f/f	#20	1	1.88316		Range		0.71093	0.35971
0.000198223	PV-Cre/NR1f/f	#20	2	1.98223		Interquartile Range		0.5351	0.2404
0.000195533	PV-Cre/NR1f/f	#20	3	1.95533
0.000208437	PV-Cre/NR1f/f	#21	1	2.08437		Normality Test
0.000208551	PV-Cre/NR1f/f	#21	2	2.08551		Kolmogorov-Smirnov
0.000201905	PV-Cre/NR1f/f	#21	3	2.01905			KS-stat	df	p-value
0.000200151	PV-Cre/NR1f/f	#22	1	2.00151		PV-Cre NR1f/f	0.207	9	0.2
0.000173946	PV-Cre/NR1f/f	#22	2	1.73946		PV-Cre	0.25	12	0.036
0.00017258	PV-Cre/NR1f/f	#22	3	1.7258
						Linear Mixed Models					Generalized estimation equations
						Fixed variables	Group; Time				Fixed variables	Group; Time;
						Random variables	Subject				Random variables	Subject
						Akaike's Information Criterion (AIC)	-18.812				Quasi Likelihood under Independence Model Criterion (QIC)	8.62155
						Fixed Effects					Model Effects
								F	p-value			Wald Chi-Square	df	p-value
							Group	F(1,7) = 77.880	4.8e-05		Group	29.117	1	6.8134e-08
							Time	F(2,7) = 0.215	0.811763		Time	0.084	2	0.959059
						Normality of Residuals
						Kolmogorov-Smirnov
							KS-stat	df	p-value
						Residuals	0.251	21	0.001

## Sheet: Fig. 4I
Duration (s)	Group	Subject	Time		Descriptive Statistics
0.755288	PV-Cre	#12	1
0.61088	PV-Cre	#12	2				PV-Cre	PV-Cre/NR1f/f
0.450198	PV-Cre	#12	3		Mean		0.624417	0.691778
0.409346	PV-Cre	#14	1		95% Confidence Interval for Mean	Lower Bound	0.458749	0.545716
0.412412	PV-Cre	#14	2			Upper Bound	0.790085	0.837839
0.405724	PV-Cre	#14	3		5% Trimmed Mean		0.608796	0.687753
0.616499	PV-Cre	#18	1		Median		0.5305	0.721
0.414804	PV-Cre	#18	2		Variance		0.068	0.036
0.399888	PV-Cre	#18	3		Std. Deviation		0.260743	0.190019
1.00128	PV-Cre	#19	1		Std. Error of the Mean		0.0651857	0.0633396
1.127	PV-Cre	#19	2		Minimum		0.4	0.406
0.889137	PV-Cre	#19	3		Maximum		1.13	1.05
0.661915	PV-Cre/NR1f/f	#20	1		Range		0.73	0.644
0.721795	PV-Cre/NR1f/f	#20	2		Interquartile Range		0.44575	0.2115
0.721489	PV-Cre/NR1f/f	#20	3
0.769369	PV-Cre/NR1f/f	#21	1		Normality Test
0.750225	PV-Cre/NR1f/f	#21	2		Kolmogorov-Smirnov
1.05338	PV-Cre/NR1f/f	#21	3			KS-stat	df	p-value
0.711614	PV-Cre/NR1f/f	#22	1		PV-Cre NR1f/f	0.231	9	0.181
0.405801	PV-Cre/NR1f/f	#22	2		PV-Cre	0.248	12	0.039629
0.433762	PV-Cre/NR1f/f	#22	3
					Linear Mixed Models
					Fixed variables	Group; Time;
					Random variables	Subject
					Akaike's Information Criterion (AIC)	-1.12936
					Fixed Effects
							F	p-value
						Group	F(1,7) = 2.367	0.168
						Time	F(2,7) = 0.894	0.451
					Normality of Residuals
					Kolmogorov-Smirnov
						KS-stat	df	p-value
					Residuals	0.181	21	0.07

## Sheet: Fig. 4J
Duration (s)	Group	Subject	Time		Descriptive Statistics
0.753407	PV-Cre	#12	1
0.795588	PV-Cre	#12	2				PV-Cre	PV-Cre/NR1f/f
0.676019	PV-Cre	#12	3		Mean		0.618333	0.452556
0.566822	PV-Cre	#14	1		95% Confidence Interval for Mean	Lower Bound	0.549622	0.373563
0.541472	PV-Cre	#14	2			Upper Bound	0.687044	0.531548
0.484346	PV-Cre	#14	3		5% Trimmed Mean		0.616093	0.451728
0.481243	PV-Cre	#18	1		Median		0.632	0.456
0.485403	PV-Cre	#18	2		Variance		0.012	0.011
0.606159	PV-Cre	#18	3		Std. Deviation		0.108143	0.102766
0.65787	PV-Cre	#19	1		Std. Error of the Mean		0.0270358	0.0342552
0.712346	PV-Cre	#19	2		Minimum		0.481	0.275
0.660802	PV-Cre	#19	3		Maximum		0.796	0.645
0.420084	PV-Cre/NR1f/f	#20	1		Range		0.315	0.37
0.45625	PV-Cre/NR1f/f	#20	2		Interquartile Range		0.204	0.11
0.420711	PV-Cre/NR1f/f	#20	3
0.364932	PV-Cre/NR1f/f	#21	1		Normality Test
0.509459	PV-Cre/NR1f/f	#21	2		Kolmogorov-Smirnov
0.645023	PV-Cre/NR1f/f	#21	3			KS-stat	df	p-value
0.485648	PV-Cre/NR1f/f	#22	1		PV-Cre NR1f/f	0.18	9	0.2
0.495695	PV-Cre/NR1f/f	#22	2		PV-Cre	0.143	12	0.2
0.27544	PV-Cre/NR1f/f	#22	3
					Linear Mixed Models
					Fixed variables	Group; Time;
					Random variables	Subject
					Akaike's Information Criterion (AIC)	-47.154
					Fixed Effects
							F	p-value
						Group	F(1,6) = 223.11	1e-06
						Time	F(2,6) = 3.71	0.079658
					Normality of Residuals
					Kolmogorov-Smirnov
						KS-stat	df	p-value
					Residuals	0.166	21	0.135

## Sheet: Tables 4I-J
Median and Median Absolute Deviation (MAD) of duration of DOWN and UP states for individual animal
		Group
		PV-Cre					PV-Cre/NR1f/f
Animal ID		#12	#14	#18	#19		#20	#21	#22
DOWN duration (s)	Median	0.55	0.35	0.4	0.95		0.45	0.7	0.3
	MAD	0.25	0.15	0.2	0.45		0.3	0.45	0.3
UP duration (s)	Median	0.6	0.45	0.45	0.6		0.45	0.35	0.35
	MAD	0.25	0.15	0.15	0.2		0.1	0.2	0.15
